# Supplementary material
Source: PubMed Central journal article supplement (PMC2852004)
Supplement: 1000854107_pnas.201000854SI.pdf [file 1000854107_pnas.201000854SI.pdf]

# Supporting Information

D'Autilia et al. 10.1073/pnas.1000854107

## SI Materials and Methods

**Animals.** To obtain embryos, induction of ovulation of *Xenopus* females, in vitro fertilization, and embryo culture were carried out as described by Newport and Kirschner (1). Embryos were staged according to Nieuwkoop and Faber (2). Embryos were raised at 18 °C on a 12-h/12-h LD cycle with lights on at ZT0 and lights off at ZT12.

**In Situ Hybridization.** Whole-mount in situ hybridization and in situ hybridization on cryosections were performed as described previously (3). For in situ hybridization on dissected brains, stage 46 embryos were fixed in MEMFA [100 mM Mops (pH 7.4), 2 mM EGTA, 1 mM MgSO<sub>4</sub>, 3.7% (vol/vol) formaldehyde] for 30 min at room temperature. Brains were manually dissected using Dumont number 5 tweezers, postfixed in MEMFA for 30 min at room temperature, and finally stored in 100% (vol/vol) ethyl alcohol at -20 °C.

The *Xbsx* probe was transcribed from the pBS-*Xbsx* plasmid, which contains the full *Xbsx* coding sequence. The templates for the production of in situ hybridization probes for *Tph* (4), *Xotx5b* (5), *Hermes* (6), and cyclin D1 (7) have been described previously.

**Embryo Microinjections and BrdU Incorporation.** To make the GR-*Xbsx* expression construct, the ORF of *Xbsx* was PCR-amplified using the primers gcAGATATCATGAATTTAAATTTACTTCCCCTGGG (forward) and GTCCTCGAGCTATAGCAAATGCTGCG (reverse) and was inserted into the EcoRV/XhoI sites of pCS2<sup>+</sup>/GR. Capped synthetic RNAs were generated in vitro by SP6 transcription from pCS2GR*Xbsx*, pCS2mt*XcyclinA2*, pCS2mt*Xcdk2* (8, 9), and pCS2GFP. GR-*Xbsx* mRNA (50 pg), *MoXbsx* (1 pmol), and cyclin A2 (50 pg)/*cdk2* (50 pg) were co-injected with GFP mRNA (200 pg) into both dorsal blastomeres at the four-cell stage. GR-*Xbsx* protein was activated at the end of gastrulation (stage 11.5) by adding dexamethasone to the culture medium (final concentration 10<sup>-5</sup> M). Addition of dexamethasone

to control uninjected embryos did not affect pineal cell proliferation and photoreceptor generation.

BrdU was delivered by means of intraabdominal injection at the indicated stage, and embryos were fixed 2 h after the treatment. BrdU incorporation was detected as previously described (10).

**Immunostaining.** Immunohistochemistry were performed according to the method of Viczian et al. (5). To identify pineal photoreceptors, an anti-RECOVERIN antibody (code AB5585; Chemicon International) was used at a final dilution of 1:100. Cy2 goat anti-mouse (Oregon green, code 011038; Molecular Probes) secondary antibodies were used at a final concentration of 1:500. Hoechst 33258 (final concentration 0.12 g/mL; Sigma) was used to counterstain cell nuclei.

**Antisense Oligonucleotide Morpholino.** The *Xbsx* antisense morpholino used was: 5'-CTATAACAAGATGAGACCTGTTAC-3' (Gene Tools, LLC). A standard morpholino oligo (Gene Tools, LLC) was injected as a control. The specificity of *Xbsx*Mo was assayed by Western blot analysis, testing the effects on the translation of Myc-tagged constructs carrying either the WT *Xbsx* morpholino target sequence (5'-gtaacaggtctcatctgttttag-3') or a five-mismatch mutated sequence (5'-gtaCcTggtGtcatAttgtAta-tag-3') (Fig. S1).

**RT-PCR.** For RT-PCR, total RNA was isolated from *Xenopus* embryos at the indicated time points starting at stage 26. The corresponding cDNAs were prepared using oligo deoxythymidine primers and superscript reverse transcriptase (Gibco BRL). To amplify *Xbsx* and ornithine decarboxylase (ODC) cDNA, the following primers were used: *Xbsx*, ATCAGGGT TGCCAGTACCAG (forward), CTGCGATGGACACAAAT CATC (reverse); and ODC, 5'-AATGGATTTTCAGAGACCA-3' (forward), 5'-CCAAGGCTAAAGTTGCAG-3' (reverse).

1. Newport J, Kirschner M (1982) A major developmental transition in early *Xenopus* embryos: I. Characterization and timing of cellular changes at the midblastula stage. *Cell* 30:675-686.
2. Nieuwkoop PD, Faber J (1967) *Normal Table of Development of Xenopus laevis (Daudin)*. North-Holland (Elsevier, Amsterdam).
3. D'Autilia S, et al. (2006) Cloning and developmental expression of the *Xenopus* homeobox gene *Xvsx1*. *Dev Genes Evol* 216:829-834.
4. Green CB, Cahill GM, Besharse JC (1995) Regulation of tryptophan hydroxylase expression by a retinal circadian oscillator in vitro. *Brain Res* 677:283-290.
5. Viczian AS, Vignali R, Zuber ME, Barsacchi G, Harris WA (2003) *XOtx5b* and *XOtx2* regulate photoreceptor and bipolar fates in the *Xenopus* retina. *Development* 130:1281-1294.
6. Gerber WV, et al. (1999) The RNA-binding protein gene, *hermes*, is expressed at high levels in the developing heart. *Mech Dev* 80:77-86.
7. Vernon AE, Philpott A (2003) The developmental expression of cell cycle regulators in *Xenopus laevis*. *Gene Expression Patterns* 3:179-192.
8. Paris J, et al. (1991) Cloning by differential screening of a *Xenopus* cDNA coding for a protein highly homologous to *cdc2*. *Proc Natl Acad Sci USA* 88:1039-1043.
9. Howe JA, Howell M, Hunt T, Newport JW (1995) Identification of a developmental timer regulating the stability of embryonic cyclin A and a new somatic A-type cyclin at gastrulation. *Genes Dev* 9:1164-1176.
10. Casarosa S, et al. (2003) *Xrx1* controls proliferation and multipotency of retinal progenitors. *Mol Cell Neurosci* 22:25-36.



**Table S1. Total number of cells counted in BrdU incorporation experiments**

|                                      |       |       |       |       |     |       |     |       |       |
|--------------------------------------|-------|-------|-------|-------|-----|-------|-----|-------|-------|
| WT                                   |       |       |       |       |     |       |     |       |       |
| Stage                                | 26    | 28    | 32    | 34    | 36  | 38    | 38  | 39    | 40    |
| ZT                                   | 6     | 12    | 18    | 0     | 6   | 12    | 18  | 0     | 6     |
| BrdU <sup>+</sup> ,Otx5 <sup>+</sup> | 164   | 174   | 129   | 76    | 164 | 179   | 85  | 75    | 201   |
| Otx5 <sup>+</sup>                    | 816   | 893   | 941   | 803   | 940 | 1,119 | 843 | 1,143 | 1,364 |
| MoXbsx                               |       |       |       |       |     |       |     |       |       |
| ZT                                   | 6     | 12    | 18    | 0     | 6   | 12    | 18  | 0     |       |
| Control                              |       |       |       |       |     |       |     |       |       |
| BrdU <sup>+</sup> ,Otx5 <sup>+</sup> | 98    | 97    | 111   | 101   | 149 | 147   | 54  | 80    |       |
| Otx5 <sup>+</sup>                    | 584   | 684   | 889   | 933   | 961 | 1013  | 545 | 940   |       |
| MoXbsx                               |       |       |       |       |     |       |     |       |       |
| BrdU <sup>+</sup> ,Otx5 <sup>+</sup> | 151   | 109   | 117   | 127   | 123 | 116   | 100 | 85    |       |
| Otx5 <sup>+</sup>                    | 908   | 774   | 625   | 668   | 843 | 832   | 817 | 902   |       |
| GR-Xbsx                              |       |       |       |       |     |       |     |       |       |
| ZT                                   | 6     | 12    | 18    | 0     |     |       |     |       |       |
| GR-Xbsx – DEX                        |       |       |       |       |     |       |     |       |       |
| BrdU <sup>+</sup> ,Otx5 <sup>+</sup> | 252   | 174   | 206   | 183   |     |       |     |       |       |
| Otx5 <sup>+</sup>                    | 1,473 | 1,055 | 1,415 | 1,591 |     |       |     |       |       |
| GR-Xbsx + DEX                        |       |       |       |       |     |       |     |       |       |
| BrdU <sup>+</sup> ,Otx5 <sup>+</sup> | 147   | 188   | 173   | 179   |     |       |     |       |       |
| Otx5 <sup>+</sup>                    | 1,346 | 1,465 | 1,363 | 1,480 |     |       |     |       |       |

The number of cells positive for both BrdU and Otx5 (BrdU<sup>+</sup>,Otx5<sup>+</sup>) and the total number of Otx5-positive cells (Otx5<sup>+</sup>) are indicated. DEX, dexamethasone.
